# Supplementary material for: Three-Dimensional Whole-Organ Characterization of the Regional Alveolar Morphology in Normal Murine Lungs
Source: Frontiers journal article supplement (doi:10.3389/fphys.2021.755468), 2021-12-08
Supplement: Data_Sheet_1.PDF [file Data_Sheet_1.PDF]

## Supplementary Material

### Three-dimensional whole-organ characterization of the regional alveolar morphology in normal murine lungs

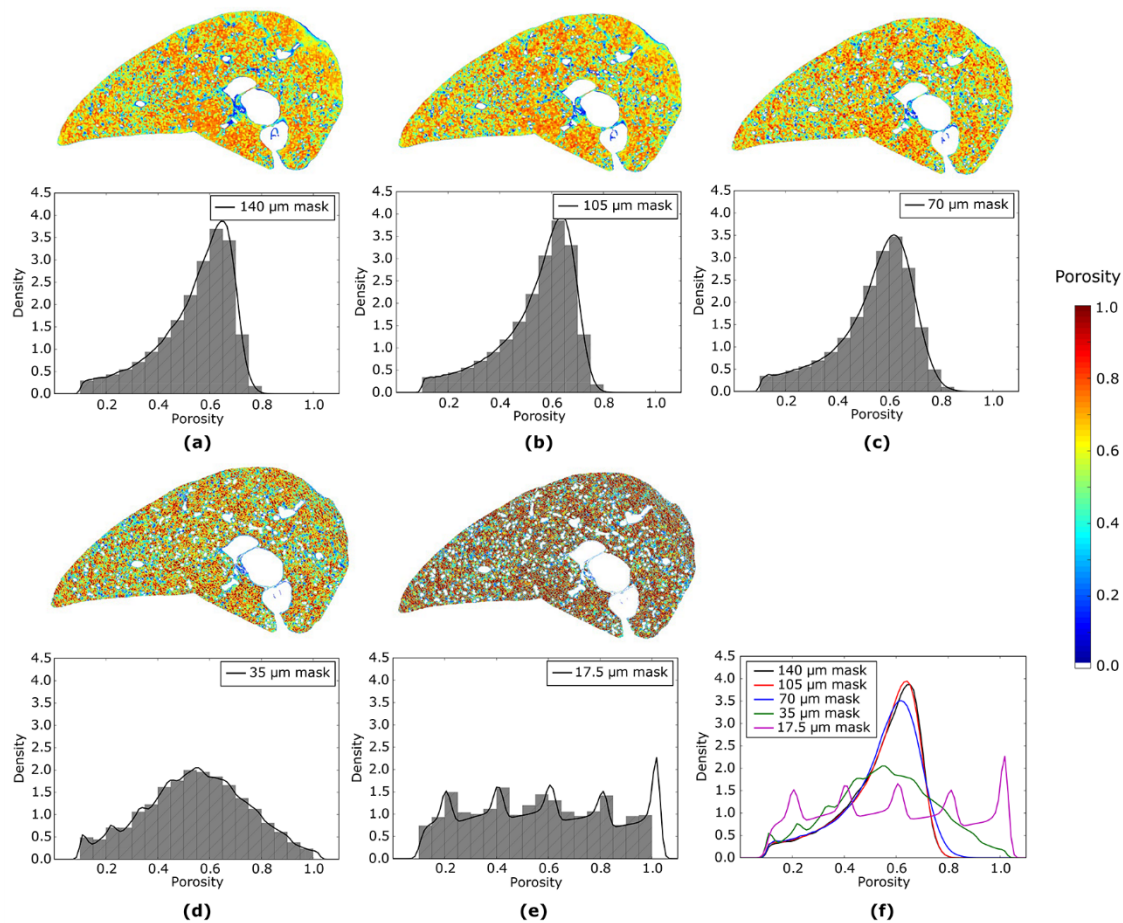

**Figure 1s.** Sensitivity analysis of the mask size in the generation of porosity maps. Histograms for the medium zone of a representative subject from the MAF group were constructed from porosity maps that employed a mask size of (a) 140  $\mu\text{m}$ , (b) 105  $\mu\text{m}$ , (c) 70  $\mu\text{m}$ , (d) 35  $\mu\text{m}$ , and (e) 17.5  $\mu\text{m}$ . Density functions fitted to histograms for all cases are shown in (f) for comparison purposes.

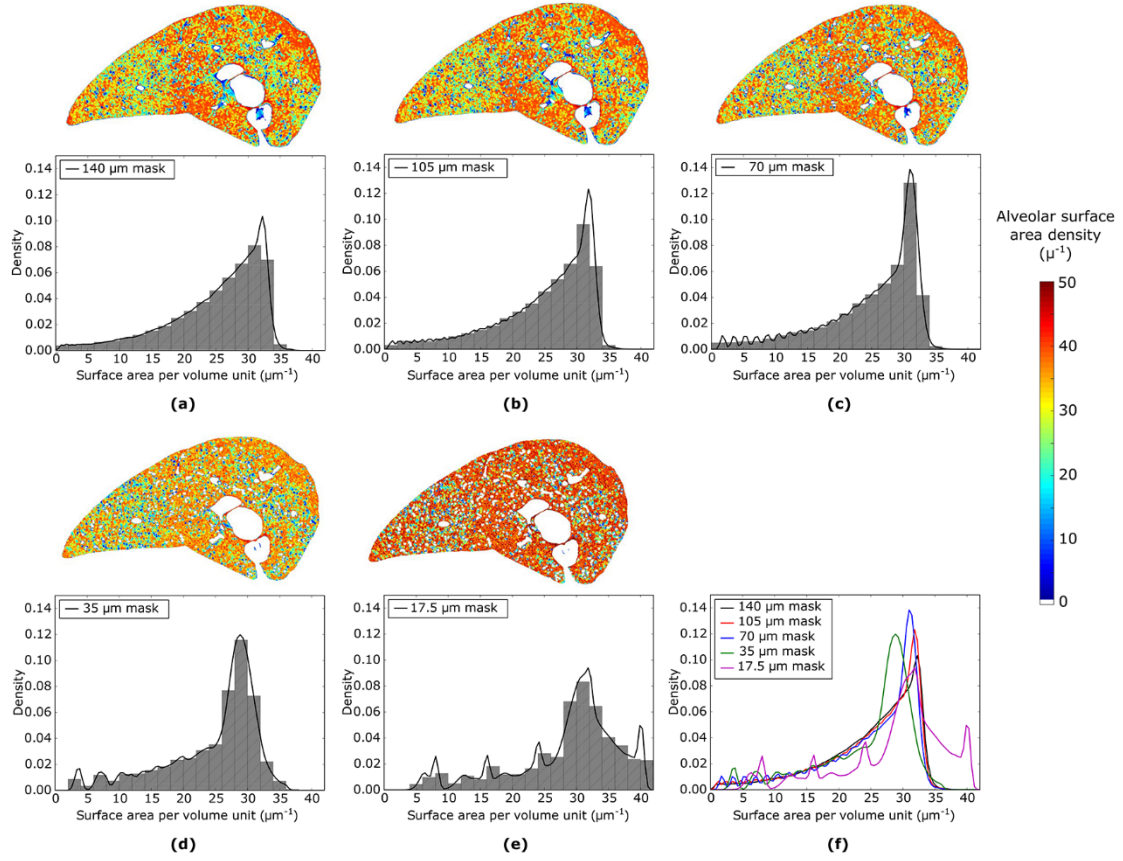

**Figure 2s.** Sensitivity analysis of the mask size in the generation of alveolar surface area density maps. Histograms for the medium zone of a representative subject from the MAF group were constructed from alveolar surface area density maps that employed a mask size of (a) 140  $\mu\text{m}$ , (b) 105  $\mu\text{m}$ , (c) 70  $\mu\text{m}$ , (d) 35  $\mu\text{m}$ , and (e) 17.5  $\mu\text{m}$ . Density functions fitted to histograms for all cases are shown in (f) for comparison purposes.

**Table 1s.** ANOVA results for the analysis of lung porosity in single lungs of groups SAF, MAF, SAF-HMDS.

| <b>ANOVA Summary</b>  |            |                |                                |                            |                         |               |                |
|-----------------------|------------|----------------|--------------------------------|----------------------------|-------------------------|---------------|----------------|
|                       |            | <b>Source</b>  | <b>Degrees of Freedom (DF)</b> | <b>Sum of Squares (SS)</b> | <b>Mean Square (MS)</b> | <b>F-Stat</b> | <b>P-Value</b> |
| <b>SAF Group</b>      | <b>L01</b> | Between Groups | 2                              | 0.0643                     | 0.0321                  | 49.605        | 0.0222         |
|                       |            | Within Groups  | 15                             | 0.0971                     | 0.0065                  |               |                |
|                       |            | Total:         | 17                             | 0.1614                     |                         |               |                |
|                       | <b>L02</b> | Between Groups | 2                              | 0.0819                     | 0.041                   | 30.5011       | 0              |
|                       |            | Within Groups  | 15                             | 0.0201                     | 0.0013                  |               |                |
|                       |            | Total:         | 17                             | 0.1021                     |                         |               |                |
|                       | <b>L03</b> | Between Groups | 2                              | 0.0718                     | 0.0359                  | 26.818        | 0              |
|                       |            | Within Groups  | 15                             | 0.0201                     | 0.0013                  |               |                |
|                       |            | Total:         | 17                             | 0.0919                     |                         |               |                |
| <b>MAF Group</b>      | <b>L01</b> | Between Groups | 2                              | 0.0007                     | 0.0003                  | 0.6786        | 0.5223         |
|                       |            | Within Groups  | 15                             | 0.0076                     | 0.0005                  |               |                |
|                       |            | Total:         | 17                             | 0.0083                     |                         |               |                |
|                       | <b>L02</b> | Between Groups | 2                              | 0.0017                     | 0.0009                  | 1.1193        | 0.3523         |
|                       |            | Within Groups  | 15                             | 0.0117                     | 0.0008                  |               |                |
|                       |            | Total:         | 17                             | 0.0134                     |                         |               |                |
|                       | <b>L03</b> | Between Groups | 2                              | 0.0014                     | 0.0007                  | 1.8254        | 0.1952         |
|                       |            | Within Groups  | 15                             | 0.0059                     | 0.0004                  |               |                |
|                       |            | Total:         | 17                             | 0.0073                     |                         |               |                |
| <b>SAF-HDMS Group</b> | <b>L01</b> | Between Groups | 2                              | 0.0008                     | 0.0004                  | 0.6225        | 0.5499         |
|                       |            | Within Groups  | 15                             | 0.0093                     | 0.0006                  |               |                |
|                       |            | Total:         | 17                             | 0.0101                     |                         |               |                |
|                       | <b>L02</b> | Between Groups | 2                              | 0.0028                     | 0.0014                  | 5.69          | 0.0145         |
|                       |            | Within Groups  | 15                             | 0.0037                     | 0.0002                  |               |                |
|                       |            | Total:         | 17                             | 0.0065                     |                         |               |                |
|                       | <b>L03</b> | Between Groups | 2                              | 0.0003                     | 0.0001                  | 0.1214        | 0.8865         |
|                       |            | Within Groups  | 15                             | 0.0177                     | 0.0012                  |               |                |
|                       |            | Total:         | 17                             | 0.018                      |                         |               |                |

**Table 2s.** ANOVA results for the analysis of alveolar surface density in single lungs of groups SAF, MAF, SAF-HMDS.

| ANOVA Summary  |     |                |                         |                     |                  |        |         |
|----------------|-----|----------------|-------------------------|---------------------|------------------|--------|---------|
|                |     | Source         | Degrees of Freedom (DF) | Sum of Squares (SS) | Mean Square (MS) | F-Stat | P-Value |
| SAF Group      | L01 | Between Groups | 2                       | 0.772               | 0.386            | 0.0679 | 0,9347  |
|                |     | Within Groups  | 15                      | 85.3204             | 5.688            |        |         |
|                |     | Total:         | 17                      | 86.0924             |                  |        |         |
|                | L02 | Between Groups | 2                       | 15.1533             | 7.5767           | 62.657 | 0.0105  |
|                |     | Within Groups  | 15                      | 18.1383             | 1.2092           |        |         |
|                |     | Total:         | 17                      | 33.2917             |                  |        |         |
|                | L03 | Between Groups | 2                       | 0.4137              | 0.2069           | 0.1187 | 0.8889  |
|                |     | Within Groups  | 15                      | 26.1509             | 1.7434           |        |         |
|                |     | Total:         | 17                      | 26.5646             |                  |        |         |
| MAF Group      | L01 | Between Groups | 2                       | 20.888              | 1.0444           | 0.2362 | 0.7925  |
|                |     | Within Groups  | 15                      | 66.322              | 4.4215           |        |         |
|                |     | Total:         | 17                      | 68.4108             |                  |        |         |
|                | L02 | Between Groups | 2                       | 60.506              | 3.0253           | 0.5072 | 0.6122  |
|                |     | Within Groups  | 15                      | 89.4727             | 5.9648           |        |         |
|                |     | Total:         | 17                      | 95.5233             |                  |        |         |
|                | L03 | Between Groups | 2                       | 60.104              | 3.0052           | 0.8977 | 0.4283  |
|                |     | Within Groups  | 15                      | 50.2137             | 3.3476           |        |         |
|                |     | Total:         | 17                      | 56.2242             |                  |        |         |
| SAF-HDMS Group | L01 | Between Groups | 2                       | 0.9522              | 0.4761           | 0.1009 | 0.9047  |
|                |     | Within Groups  | 15                      | 70.8119             | 4.7208           |        |         |
|                |     | Total:         | 17                      | 71.7641             |                  |        |         |
|                | L02 | Between Groups | 2                       | 2.7754              | 1.3877           | 0.6373 | 0.5424  |
|                |     | Within Groups  | 15                      | 32.6616             | 2.1774           |        |         |
|                |     | Total:         | 17                      | 35.437              |                  |        |         |
|                | L03 | Between Groups | 2                       | 14.6665             | 7.3333           | 0.9183 | 0.4205  |
|                |     | Within Groups  | 15                      | 119.7805            | 7.9854           |        |         |
|                |     | Total:         | 17                      | 13.4447             |                  |        |         |
